# Supplementary material
Source: publisher figshare collection journal article supplement (https://karger.figshare.com/articles/dataset/_/5562730)
Supplement: Supplementary file 2 [file 1]

Online supplementary table 1

|         | Baseline (T0)  |          | Discharge (T1)  |          | T1                        |          |          | T0-T1                    |          |          |
|---------|----------------|----------|-----------------|----------|---------------------------|----------|----------|--------------------------|----------|----------|
|         |                |          | Estimated means |          | Between group comparisons |          |          | Within-group comparisons |          |          |
|         | <i>M (SD)</i>  | <i>n</i> | <i>M (SD)</i>   | <i>n</i> | <i>F (df)</i>             | <i>p</i> | <i>d</i> | <i>t (df); r</i>         | <i>p</i> | <i>d</i> |
| PHQ-9   |                |          |                 |          | 9.52 (1, 212)             | .003     | 0.40     |                          |          |          |
| IG      | 14.86 (4.88)   | 108      | 9.71 (4.98)     | 108      |                           |          |          | 9.49 (107); 0.45         | <.001    | 0.95     |
| CG      | 14.30 (5.23)   | 107      | 11.74 (5.12)    | 107      |                           |          |          | 5.04 (106); 0.56         | <.001    | 0.45     |
| GAD-7   |                |          |                 |          | 5.97 (1, 212)             | .017     | 0.33     |                          |          |          |
| IG      | 11.59 (4.28)   | 108      | 8.02 (4.14)     | 108      |                           |          |          | 8.73 (107); 0.62         | <.001    | 0.74     |
| CG      | 11.57 (5.08)   | 107      | 9.39 (4.27)     | 107      |                           |          |          | 4.68 (106); 0.62         | <.001    | 0.40     |
| EUROHIS |                |          |                 |          | 6.38 (1, 212)             | .14      | 0.34     |                          |          |          |
| IG      | 1.62 (0.57)    | 108      | 2.14 (0.65)     | 108      |                           |          |          | 7.51 (107); 0.51         | <.001    | 0.71     |
| CG      | 1.68 (0.59)    | 107      | 1.92 (0.66)     | 107      |                           |          |          | 4.10 (106); 0.60         | <.001    | 0.36     |
| RSE     |                |          |                 |          | 7.85 (1, 212)             | .006     | 0.38     |                          |          |          |
| IG      | 15.11 (6.68)   | 108      | 18.94 (6.24)    | 108      |                           |          |          | 5.58 (107); 0.56         | <.001    | 0.51     |
| CG      | 15.40 (6.80)   | 107      | 16.57 (6.30)    | 107      |                           |          |          | 2.11 (106); 0.65         | .04      | 0.17     |
| DAS     |                |          |                 |          | 1.02 (1, 212)             | .31      | 0.14     |                          |          |          |
| IG      | 149.96 (37.05) | 108      | 141.24 (30.08)  | 108      |                           |          |          | 4.30 (107); 0.71         | <.001    | 0.31     |
| CG      | 158.42 (38.26) | 107      | 145.39 (30.20)  | 107      |                           |          |          | 3.07 (106); 0.71         | .002     | 0.23     |
| WAI     |                |          |                 |          | 0.64(1, 212)              | .52      | 0.08     |                          |          |          |
| IG      | 25.41 (2.87)   | 108      | 26.51 (2.75)    | 108      |                           |          |          | 3.46 (107); 0.42         | .001     | 0.36     |
| CG      | 25.28 (2.60)   | 107      | 26.28 (3.24)    | 107      |                           |          |          | 2.82 (106); 0.35         | .007     | 0.31     |

Notes. IG: intervention group; CG: control group; PHQ-9: Patient Health Questionnaire Depression Module; GAD-7: Generalized Anxiety Disorder; EUROHIS: European Health Interview Survey Quality of Life 8; RSE: Rosenberg Self-Esteem Scale; DAS: Dysfunctional Attitude Scale; WAI: Work Ability Index; between subjects-analyses: analyses of covariance with baseline as covariate; within-subject analyses: paired samples t-Tests.
